# Supplementary material
Source: Springer Nature journal article supplement (https://www.springerprofessional.de/resource/supplementary/13173_2013_1_MOESM1_ESM.pdf/11897006)

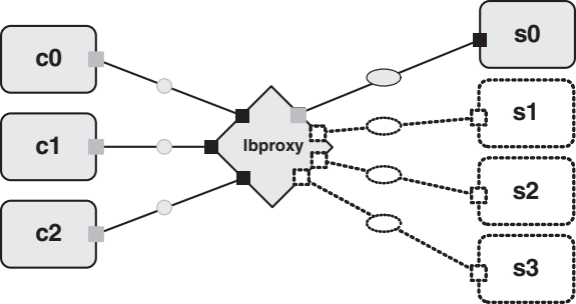

Supplement: MOESM1 [file 11897006]
